# Supplementary material for: Conserved residues in the δ subunit help the E. coli clamp loader, γ complex, target primer-template DNA for clamp assembly
Source: PubMed Central journal article supplement — Nucleic Acids Res. 2008 Apr 19;36(10):3274–86. doi: 10.1093/nar/gkn157 (PMC2425476; doi:10.1093/nar/gkn157), 2008-04-19
Supplement: gkn157_1.pdf [file gkn157_1.pdf]

A. Purified  $\delta$ ,  $\gamma_3\delta\delta'$ , and  $\gamma_3\delta\delta'\chi\psi$  proteins

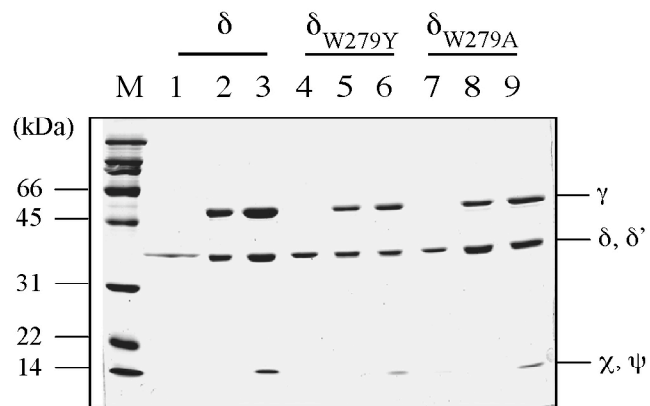

B. Elastase treatment of  $\delta$  proteins

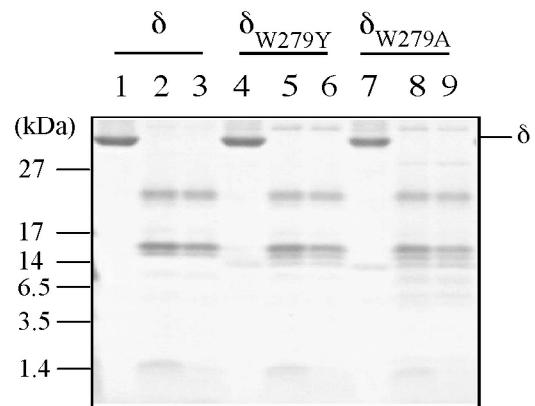

Lane : reaction time  
 1,4,7: 0 min  
 2,5,8: 30 min  
 3,6,9: 90 min

Figure S1

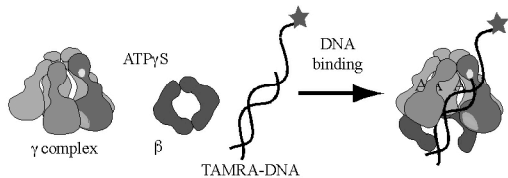

A.  $\gamma_3\delta\delta'$ - $\beta$  binding p/tDNA (60 mM NaCl)

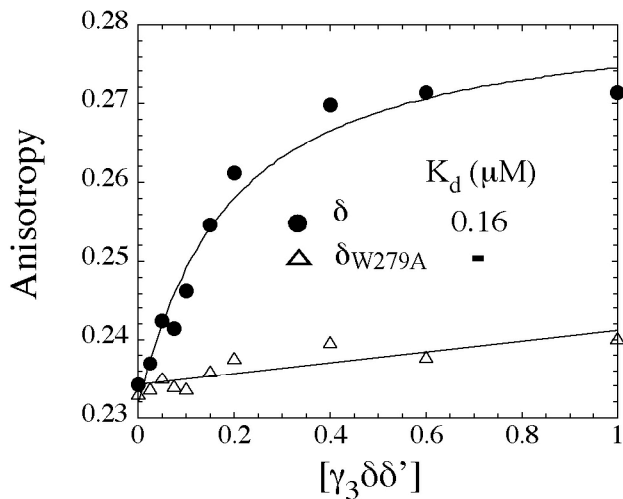

B.  $\gamma_3\delta\delta'$ - $\beta$ -p/tDNA ATPase activity

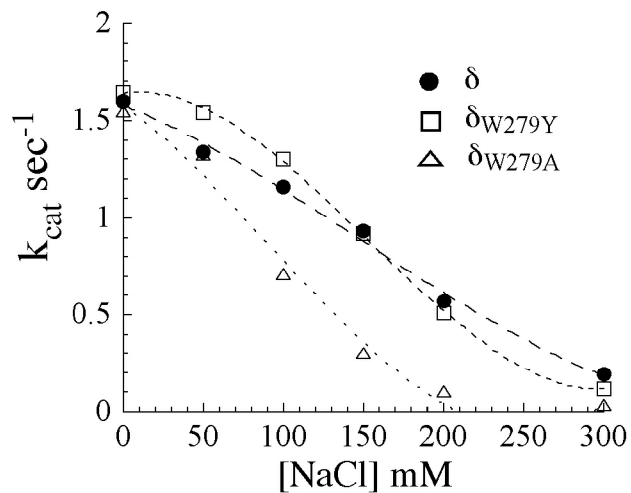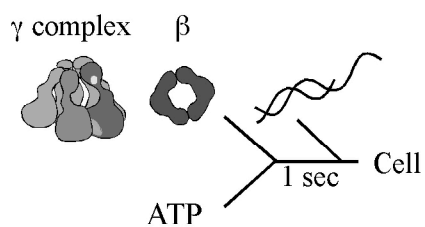

C.  $\gamma_3\delta\delta'$ - $\beta$ -p/tDNA ATPase (80 mM NaCl)

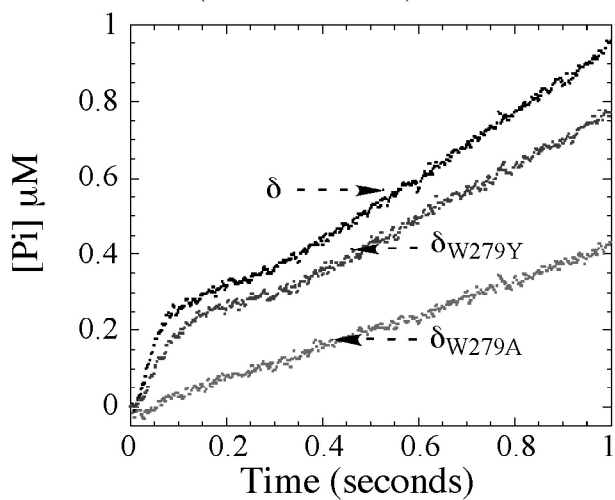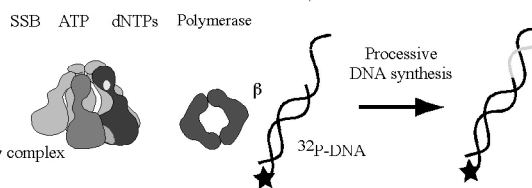

D.

|                         |   |          |               |               |          |               |               |
|-------------------------|---|----------|---------------|---------------|----------|---------------|---------------|
| $\gamma_3\delta\delta'$ | - | $\delta$ | $\delta_{WA}$ | $\delta_{WY}$ | $\delta$ | $\delta_{WA}$ | $\delta_{WY}$ |
| NaCl mM                 |   | 50       |               | 80            |          |               |               |

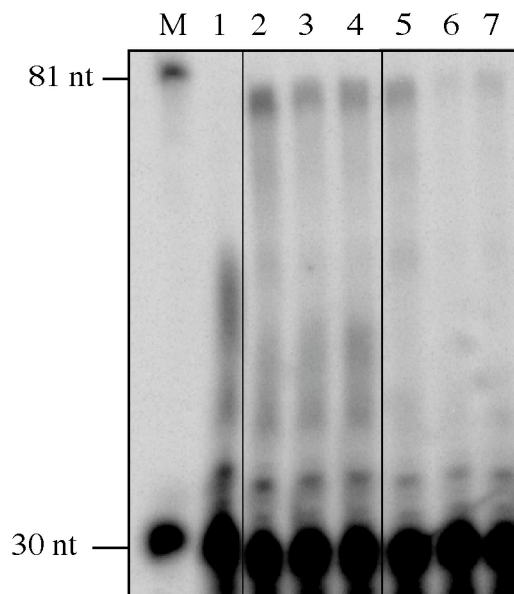

Figure S2

### A. ATase activity of $\gamma$ complexes in NaOAc

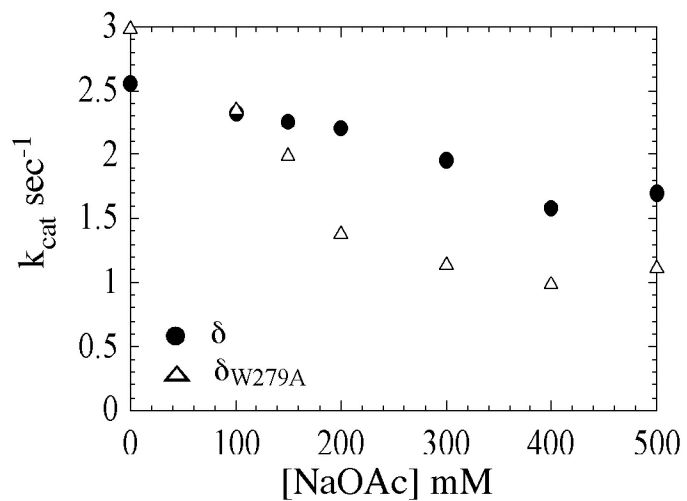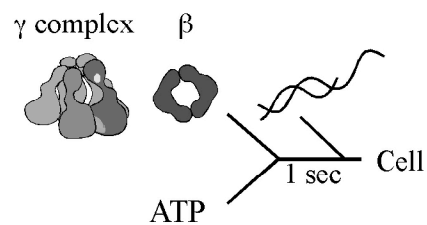

### B. $\gamma$ complex- $\beta$ -p/tDNA ATPase (100 mM NaOAc)

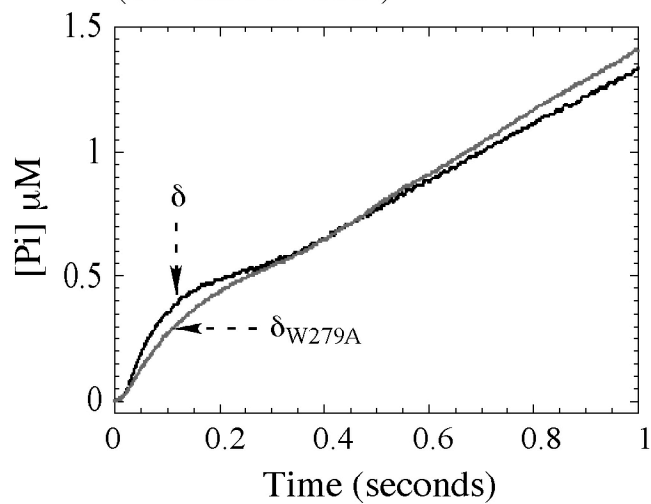

### C. $\gamma$ complex- $\beta$ -p/tDNA ATPase (200 mM NaOAc)

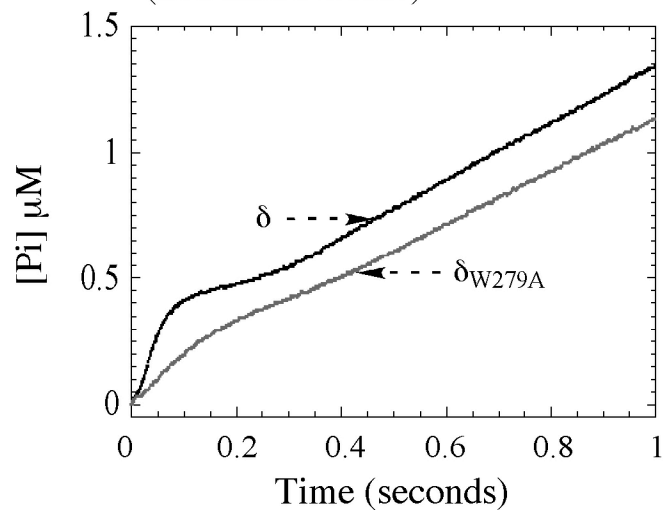

Figure S3

A. Elastase treatment of  $\delta$  proteins

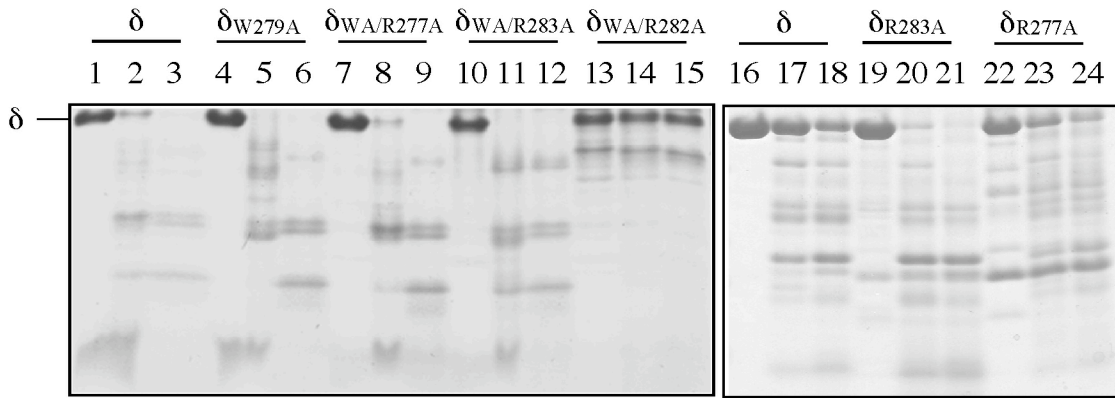

Lane :                      reaction time  
 1,4,7,10,13,16,19,22: 0 min  
 2,5,8,11,14,17,20,23: 30 min  
 3,6,9,12,15,18,21,24: 90 min

B. Purified  $\gamma_3\delta\delta'\chi\psi$  complexes

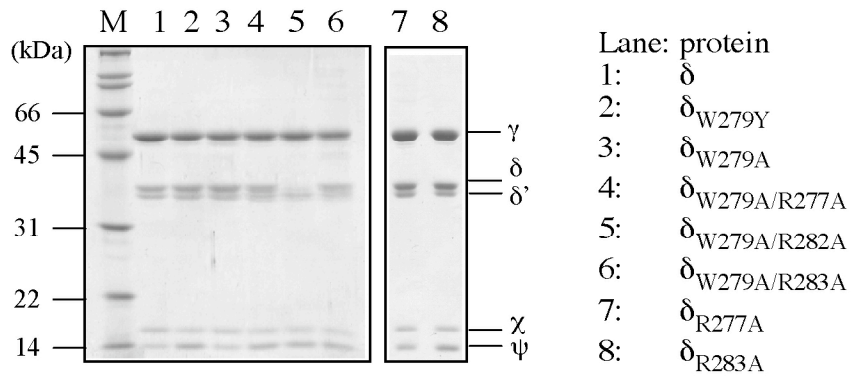

Figure S4

## Supplementary material

Figure S1. Preparation and initial characterization of  $\delta$  W279- $\gamma$  complex mutants. (A) SDS-PAGE analysis of purified  $\delta$ ,  $\delta_{W279Y}$  and  $\delta_{W279A}$  proteins, and corresponding  $\gamma\delta\delta'$  $\chi\psi$  ( $\gamma$  complex), and  $\gamma\delta\delta'$  clamp loader complexes; both mutants assemble into  $\gamma$  complexes as expected for wild type  $\delta$ . (B) Elastase treatment performed to assess the structural integrity of  $\delta$  mutants shows that wild type and mutant  $\delta$  proteins have similar proteolysis patterns. Partial proteolysis of  $\delta$  mutants was performed by incubating 6  $\mu$ M  $\delta$  in buffer (30 mM HEPES-NaOH pH 7.5, 0.1 mM EDTA pH 8.0, 2 mM DTT, 25 mM NaCl, 7% glycerol) with 0.5 units Elastase (Sigma Aldrich) at 37 °C in a final volume of 40  $\mu$ l. Next, 20  $\mu$ l aliquots of the reaction were quenched at different times (30 and 90 minutes) with 10  $\mu$ l SDS dye solution (1.5 M Tris base, 3% SDS, 35% glycerol, 150 mM DTT, bromophenol blue). The samples were heated at 90 °C for 2 minutes and analyzed by tricine gel electrophoresis on a 16.5% acrylamide gel at 4 °C (Schagger, H., and von Jagow, G. (1987) *Anal Biochem* **166**, 368-379), followed by staining with GelCode Blue Stain Reagent (Pierce).

Figure S2. Analysis of minimal clamp loader,  $\gamma\delta\delta'$ , activities. (A) Interaction between  $\gamma\delta\delta'$  and p/t DNA is highly sensitive to salt concentration, with  $K_D = 156 \pm 50$  nM for wild type  $\gamma\delta\delta'$  and barely detectable binding to  $\delta_{W279A}$ - $\gamma\delta\delta'$  even at 60 mM NaCl. (B) Steady state ATPase activity of the  $\delta_{W279A}$ - $\gamma\delta\delta'$  complex ( $\Delta$ ) is more sensitive to NaCl than wild type  $\gamma\delta\delta'$  ( $\bullet$ ), and (C)  $\delta_{W279A}$ - $\gamma\delta\delta'$  does not catalyze a burst of ATP hydrolysis even at 60 – 80 mM NaCl. (D) DNA replication reactions containing p/t DNA, SSB, ATP,  $\beta$ , dNTPs, and core polymerase, in the absence of clamp loader (lane 1) or with  $\gamma\delta\delta'$  complex (lanes 2, 5),  $\delta_{W279A}$ - $\gamma\delta\delta'$  (lanes 3, 6), and  $\delta_{W279Y}$ - $\gamma\delta\delta'$  (lanes 4, 7) reveal loss of processive DNA replication with  $\delta_{W279A}$ - $\gamma\delta\delta'$  at 80 mM NaCl. The markers are  $^{32}$ P-labeled 30 and 81 nt DNAs.

Figure S3. Effect of sodium acetate on clamp loader function mimics that of sodium chloride. (A) Steady state ATPase activity of the  $\delta_{W279A}$ - $\gamma$  complex ( $\Delta$ ) is more sensitive

to NaOAc than wild type  $\gamma$  complex (●). (B, C) Increasing NaOAc concentration lowers the rate and amplitude of the burst ATP hydrolysis phase for  $\delta_{W279A}$ - $\gamma$  complex (●) compared with wild type  $\gamma$  complex (●), indicating that the impact of  $\delta$ -W279A mutation on clamp loader function is independent of the type of anion present in the reaction.

Figure S4. Preparation and initial characterization of  $\delta$  mutants. (A) Elastase treatment performed, as described above for Figure S1, to assess the structural integrity of  $\delta$  proteins shows that the mutants have similar proteolysis patterns as wild type (0, 30, 90 minutes), except for the one harboring the  $\delta$ -R282A mutation, which indicates distinct structural changes in this protein (impurities in the  $\delta_{R277A}$  preparation are separated during purification of  $\delta_{R277A}$ - $\gamma$  complex). (B) SDS-PAGE analysis of purified  $\gamma$  complexes containing various  $\delta$  proteins; all mutants, except for  $\delta_{W279A/R282A}$ , assemble into  $\gamma$  complexes as expected for wild type  $\delta$ .
